# Supplementary material
Source: MDPI journal article supplement (https://www.mdpi.com/2073-4352/13/2/341)

# **N-Heterocyclic Carbene–Palladium Functionalized Coordination Polymer (Pd- NHC@Eu-BCI) as an Efficient Heterogeneous Catalyst in the Suzuki–Miyaura Coupling Reaction**

Lixin You<sup>1</sup>, Rui Tan<sup>1</sup>, Xiaojuan Wang<sup>1</sup>, Jianhong Hao<sup>1</sup>, Shiyu Xie<sup>1</sup>, Gang Xiong<sup>1</sup>, Fu Ding<sup>1,2</sup>,  
Andrei S. Potapov<sup>3,\*</sup> and Yaguang Sun<sup>1,2,\*</sup>

<sup>1</sup> Key Laboratory of Inorganic Molecule-Based Chemistry of Liaoning Province,  
Shenyang University of Chemical Technology, Shenyang 110142, China.

<sup>2</sup> Key Laboratory on Resources Chemicals and Material of Ministry of Education,  
Shenyang University of Chemical Technology, Shenyang 110142, China

<sup>3</sup> Nikolaev Institute of Inorganic Chemistry, Siberian Branch of the Russian Academy of  
Sciences, Lavrentiev Ave., 3, 630090 Novosibirsk, Russia

\*Correspondence: Correspondence: [potapov@niic.nsc.ru](mailto:potapov@niic.nsc.ru); [sunyaguang@syuct.edu.cn](mailto:sunyaguang@syuct.edu.cn).

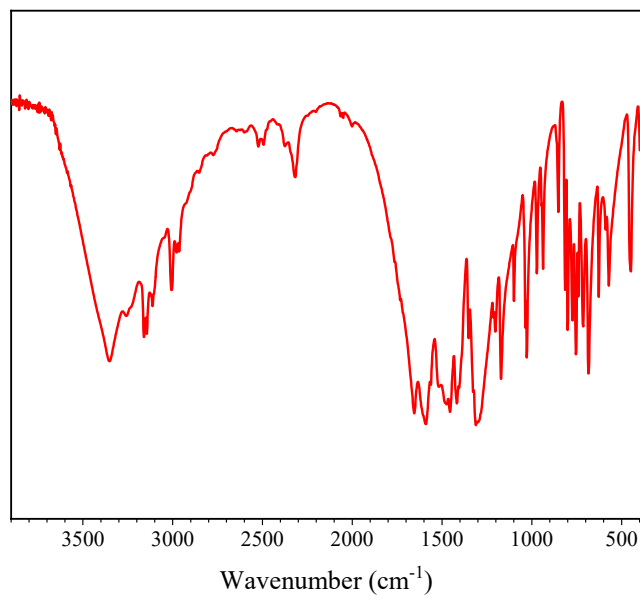

**Figure S1.** The IR spectrum of Eu-BCI.

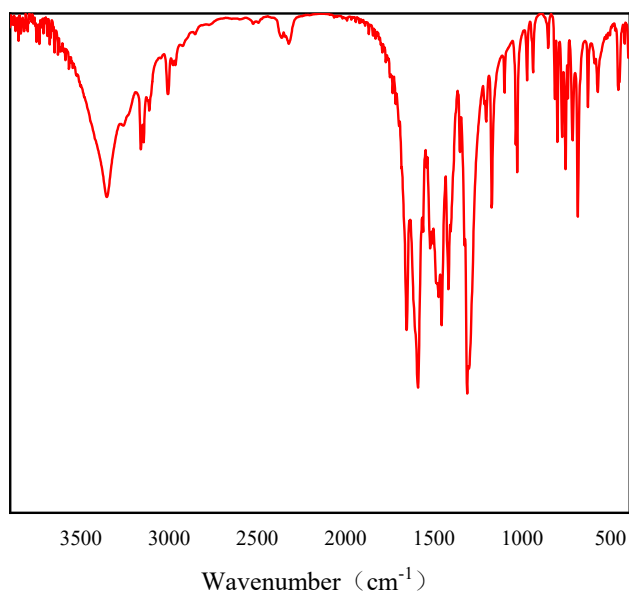

**Figure S2.** The IR spectrum of Pd-NHC@Eu-BCI.

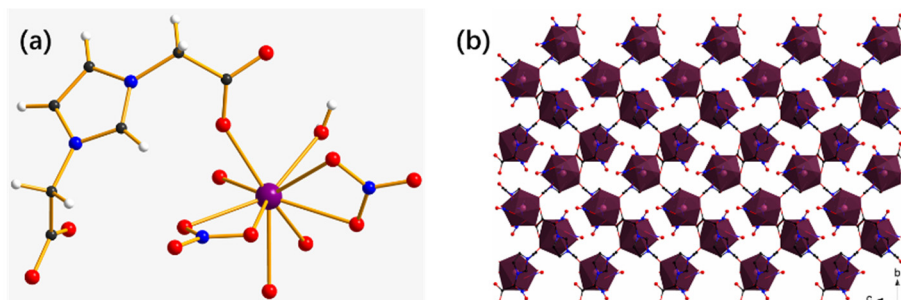

**Figure S3.** (a) Coordination environment of Eu(III) in Eu-BCI. (b) View of 2D layer of Eu-BCI.

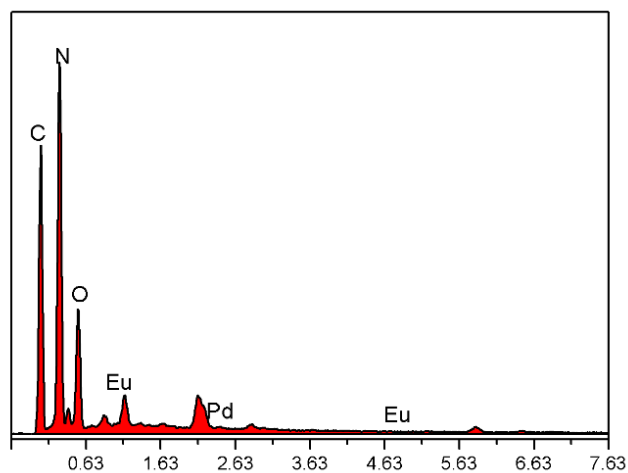

**Figure S4.** EDS spectrum of Pd-NHC@Eu-BCI.

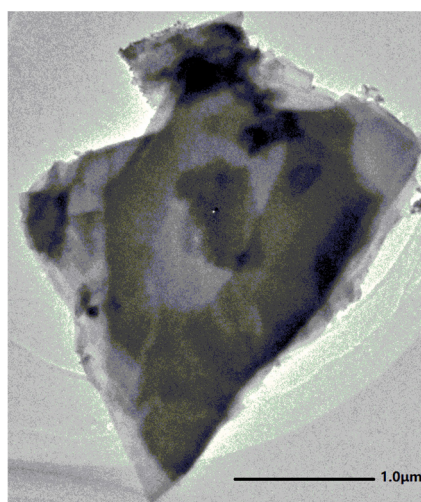

**Figure S5.** TEM of Pd-NHC@Eu-BCI.

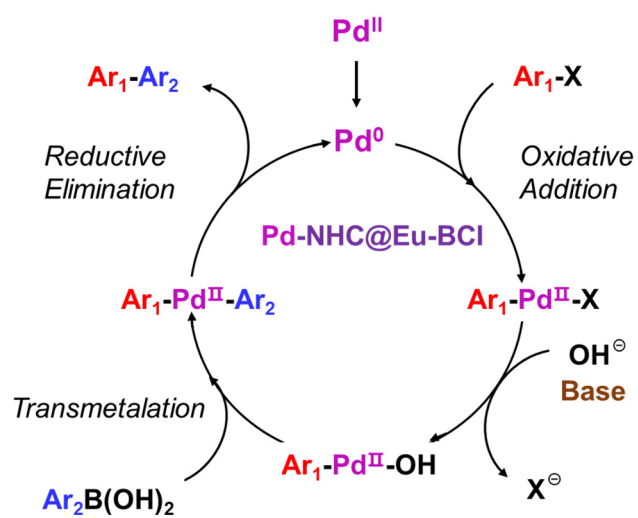

**Figure S6.** The proposed reaction mechanism of Suzuki-Miyaura cross-coupling catalyzed by Pd-NHC@Eu-BCI.

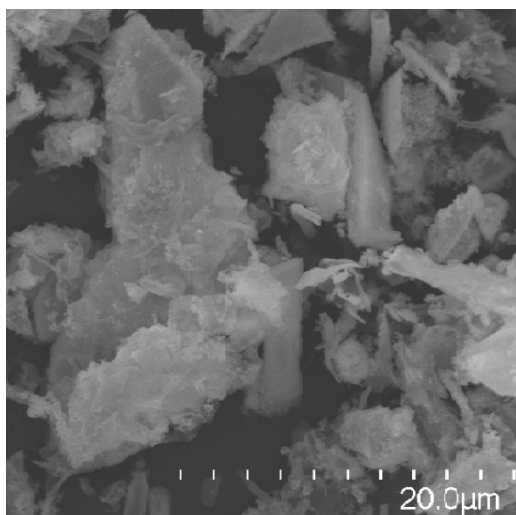

**Figure S7.** The SEM of Pd-NHC@Eu-BCI after five cycles.

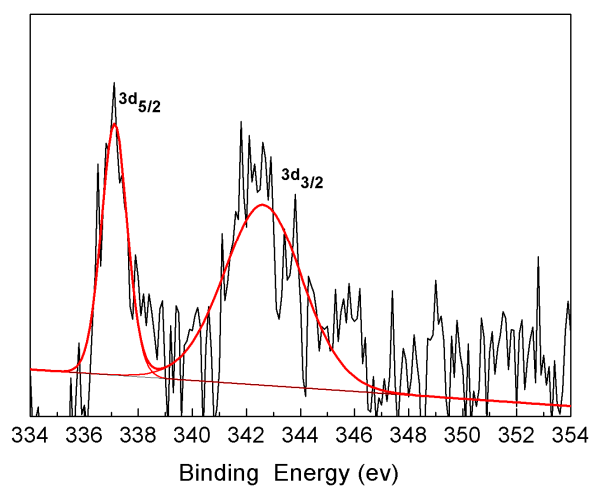

**Figure S8.** The Pd 3d XPS spectrum of Eu-BCI-Pd after five cycles.

Table S1. Suzuki-Miyaura coupling of bromobenzene with phenylboronic acid catalyzed by different samples.

| Sample                            | Yield (%) |
|-----------------------------------|-----------|
| HBCI                              | 0         |
| Eu-BCI                            | 0         |
| Eu(NO <sub>3</sub> ) <sub>3</sub> | <5        |
| Pd(OAc) <sub>2</sub>              | 87        |

Reaction conditions: aryl halide (1.0 mmol), arylboronic acid (1.2 mmol), K<sub>2</sub>CO<sub>3</sub> (2.0 mmol), EtOH (5 mL), catalyst (25 mg), temperature (80 °C), time (6 h).

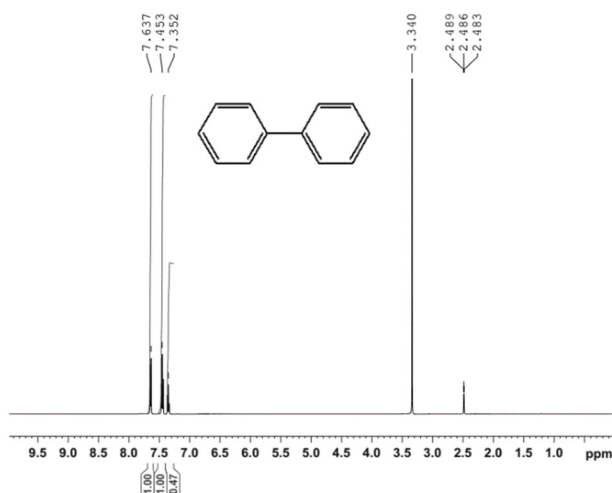

Biphenyl:  $^1\text{H}$  NMR (500 MHz,  $\text{d}_6\text{-DMSO}$ ):  $\delta = 7.35$  (t, 2H), 7.45 (t, 4H), 7.64 (d, 4H).

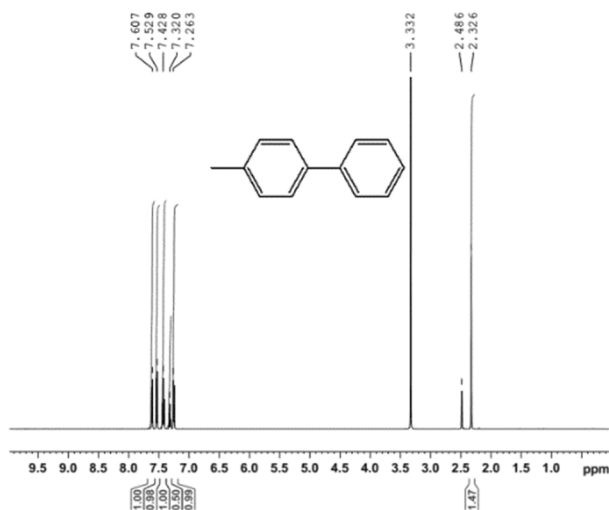

4-Methyl-1,1'-biphenyl:  $^1\text{H}$  NMR (500 MHz,  $\text{d}_6\text{-DMSO}$ ):  $\delta = 2.33$  (s, 3H), 7.26 (d, 2H), 7.32 (t, 1H), 7.43 (t, 2H), 7.53 (d, 2H), 7.61 (d, 2H).

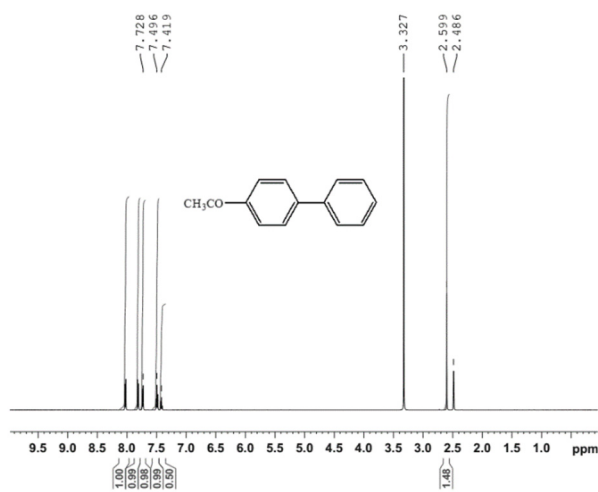

4-Acetyl-1,1'-biphenyl:  $^1\text{H}$  NMR (500 MHz,  $\text{d}_6\text{-DMSO}$ ):  $\delta = 2.60$  (s, 3H), 7.42 (t, 2H), 7.50 (t, 2H), 7.73 (d, 2H), 7.82 (d, 2H), 8.03 (d, 2H).

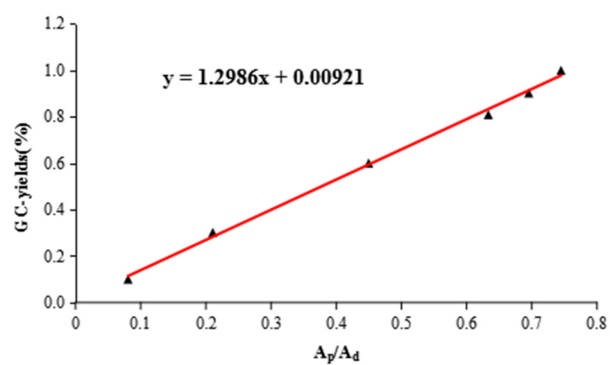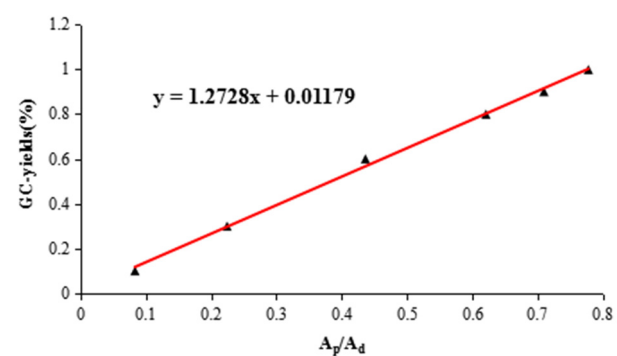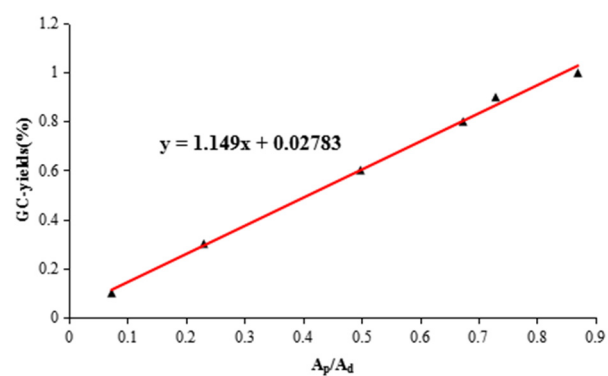

Supplement: s1 [file s1]
